# Supplementary material for: Association of the Labor Migration of Parents With Nonsuicidal Self-injury and Suicidality Among Their Offspring in China
Source: PubMed Central journal article supplement (PMC8579225; doi:10.1001/jamanetworkopen.2021.33596), 2021-11-09
Supplement: jamanetwopen-e2133596-s001.pdf [file jamanetwopen-e2133596-s001.pdf]

## Supplementary Online Content

Ma Y, Guo H, Guo S, et al. Association of the labor migration of parents with nonsuicidal self-injury and suicidality among their offspring in China. *JAMA Netw Open*. 2021;4(11):e2133596. doi:10.1001/jamanetworkopen.2021.33596

**eTable 1.** Adolescent Social Support Scale

**eTable 2.** Frequency and Prevalence of 8 Types of NSSI

**eTable 3.** Odds of NSSI, Suicidal Ideation and Suicide Attempt by Migration Status in Male vs Female Participants

**eTable 4.** Odds of NSSI, Suicidal Ideation and Suicide Attempt by Parental Migration Pattern in Male vs Female Participants

**eTable 5.** Odds of NSSI, Suicidal Ideation and Suicide Attempt by Offspring Age When Parent Initially Migrated in Male vs Female Participants

This supplementary material has been provided by the authors to give readers additional information about their work.

**eTable 1. Adolescent Social Support Scale**

Please read each item carefully, and circle "○" on the number of options that best suits your actual situation

| Items                                                                                              | Fully consistent | Consistent | Not sure | Inconsistent | Totally inconsistent |
|----------------------------------------------------------------------------------------------------|------------------|------------|----------|--------------|----------------------|
| 1. Most classmates care about me                                                                   | 1                | 2          | 3        | 4            | 5                    |
| 2. When faced with a dilemma, I will take the initiative to ask others for help                    | 1                | 2          | 3        | 4            | 5                    |
| 3. When I have troubles, I will take the initiative to confide in my family, relatives and friends | 1                | 2          | 3        | 4            | 5                    |
| 4. I often get care and support from classmates and friends                                        | 1                | 2          | 3        | 4            | 5                    |
| 5. When encountering difficulties, I often seek help from my family, relatives and friends         | 1                | 2          | 3        | 4            | 5                    |
| 6. There are many close people around me who can give me support and help                          | 1                | 2          | 3        | 4            | 5                    |
| 7. When I encounter a problem, my classmates and friends will appear by my side                    | 1                | 2          | 3        | 4            | 5                    |
| 8. In times of difficulty, I can rely on my family or friends.                                     | 1                | 2          | 3        | 4            | 5                    |
| 9. I often get emotional help and support from classmates and friends                              | 1                | 2          | 3        | 4            | 5                    |
| 10. I often get care and support from my family, relatives and friends.                            | 1                | 2          | 3        | 4            | 5                    |
| 11. When needed, I can get financial support from my family, relatives and friends                 | 1                | 2          | 3        | 4            | 5                    |
| 12. When in trouble, I usually take the initiative to seek help from others                        | 1                | 2          | 3        | 4            | 5                    |
| 13. When I am sick, I can always be taken care of by my family, relatives and friends.             | 1                | 2          | 3        | 4            | 5                    |
| 14. When I have troubles, I will take the initiative to confide in my classmates and friends       | 1                | 2          | 3        | 4            | 5                    |
| 15. When I have a problem, my family, relatives and friends will show up by my side                | 1                | 2          | 3        | 4            | 5                    |
| 16. I often get emotional help and support from my family, relatives and friends                   | 1                | 2          | 3        | 4            | 5                    |
| 17. When encountering difficulties, I often seek help from classmates and friends                  | 1                | 2          | 3        | 4            | 5                    |

**eTable 2. Frequency and Prevalence of 8 Types of NSSI**

| Type of NSSI | Frequency of NSSI (N, %) |                              |                                    |
|--------------|--------------------------|------------------------------|------------------------------------|
|              | Non-NSSI (0 time)        | Less frequent (1-4 episodes) | More frequent ( $\geq 5$ episodes) |
| Hitting      | 12786 (83.5)             | 2041(13.3)                   | 485(3.2)                           |
| Head banging | 14085 (92.0)             | 1043 (6.8)                   | 184(1.2)                           |
| Stabbing     | 13635 (89.0)             | 1337 (8.7)                   | 340 (2.2)                          |
| Pinching     | 13177 (86.1)             | 1687 (11.0)                  | 448 (2.9)                          |
| Scratching   | 14451 (94.4)             | 713 (4.7)                    | 148 (1.0)                          |
| Biting       | 14290 (93.3)             | 848 (5.5)                    | 174 (1.1)                          |
| Burning      | 15121 (98.8)             | 161 (1.1)                    | 30 (0.2)                           |
| Cutting      | 14461 (94.4)             | 706 (4.6)                    | 145 (0.9)                          |

**eTable 3. Odds of NSSI, Suicidal Ideation and Suicide Attempt by Migration Status in Male vs Female Participants**

| Variable                                 | Male      |                         |                         | Female    |                         |                         | ROR <sup>c</sup> | P value |
|------------------------------------------|-----------|-------------------------|-------------------------|-----------|-------------------------|-------------------------|------------------|---------|
|                                          | N (%)     | OR (95%CI) <sup>a</sup> | OR (95%CI) <sup>b</sup> | N (%)     | OR (95%CI) <sup>a</sup> | OR (95%CI) <sup>b</sup> |                  |         |
| <b>Less frequent NSSI (1-4 episodes)</b> |           |                         |                         |           |                         |                         |                  |         |
| No migration                             | 718(15.0) | 1 [Reference]           | 1 [Reference]           | 765(16.8) | 1 [Reference]           | 1 [Reference]           |                  |         |
| Migration                                | 558(17.9) | 1.26(1.11-1.42)         | 1.15(1.02-1.30)         | 594(20.8) | 1.31(1.16-1.48)         | 1.13(1.01-1.28)         | 1.02             | 0.20    |
| <b>More frequent NSSI (≥5 episodes)</b>  |           |                         |                         |           |                         |                         |                  |         |
| No migration                             | 536(11.2) | 1 [Reference]           | 1 [Reference]           | 545(12.0) | 1 [Reference]           | 1 [Reference]           |                  |         |
| Migration                                | 366(11.8) | 1.11(0.96-1.28)         | 1.12(0.98-1.28)         | 336(11.8) | 1.04(0.90-1.20)         | 0.93(0.78-1.10)         | 1.20             | 0.10    |
| <b>Suicidal ideation</b>                 |           |                         |                         |           |                         |                         |                  |         |
| No migration                             | 672(14.0) | 1 [Reference]           | 1 [Reference]           | 738(16.2) | 1 [Reference]           | 1 [Reference]           |                  |         |
| Migration                                | 435(14.0) | 1.00(0.88-1.14)         | 0.94(0.81-1.08)         | 490(17.2) | 1.07(0.95-1.22)         | 0.98(0.85-1.13)         | 0.96             | 0.17    |
| <b>Suicide attempt</b>                   |           |                         |                         |           |                         |                         |                  |         |
| No migration                             | 148(3.1)  | 1 [Reference]           | 1 [Reference]           | 168(3.7)  | 1 [Reference]           | 1 [Reference]           |                  |         |
| Migration                                | 110(3.5)  | 1.15(0.90-1.48)         | 1.13(0.86-1.49)         | 109(3.8)  | 1.04(0.81-1.33)         | 1.01(0.77-1.34)         | 1.12             | 0.15    |

a, unadjusted model.

b, adjusted for participant province, age, ethnicity, sex, single-child family, single-parent family, educational level of main caregiver, family income, parenting style and offspring social support, loneliness, psychological resilience, emotional management ability scores.

c, calculated by adjusted OR.

**eTable 4. Odds of NSSI, Suicidal Ideation and Suicide Attempt by Parental Migration Pattern in Male vs Female Participants**

| Variable                                 | Male      |                         |                         | Female    |                         |                         | ROR <sup>c</sup> | P value |
|------------------------------------------|-----------|-------------------------|-------------------------|-----------|-------------------------|-------------------------|------------------|---------|
|                                          | N (%)     | OR (95%CI) <sup>a</sup> | OR (95%CI) <sup>b</sup> | N (%)     | OR (95%CI) <sup>a</sup> | OR (95%CI) <sup>b</sup> |                  |         |
| <b>Less frequent NSSI (1-4 episodes)</b> |           |                         |                         |           |                         |                         |                  |         |
| No migration                             | 718(15.0) | 1 [Reference]           | 1 [Reference]           | 765(16.8) | 1 [Reference]           | 1 [Reference]           |                  |         |
| Father migration                         | 342(18.5) | 1.32(1.14-1.52)         | 1.20(1.03-1.40)         | 369(21.3) | 1.34(1.16-1.54)         | 1.17(1.01-1.36)         | 1.03             | 0.21    |
| Mother migration                         | 35(14.0)  | 0.94(0.65-1.36)         | 0.92(0.63-1.34)         | 36(15.7)  | 0.92(0.64-1.33)         | 0.78(0.53-1.14)         | 1.18             | 0.14    |
| Both parent migration                    | 181(17.8) | 1.28(1.03-1.49)         | 1.13(0.93-1.36)         | 189(21.2) | 1.36(1.13-1.63)         | 1.13(0.93-1.37)         | 1.00             | 0.25    |
| <b>More frequent NSSI (≥5 episodes)</b>  |           |                         |                         |           |                         |                         |                  |         |
| No migration                             | 536(11.2) | 1 [Reference]           | 1 [Reference]           | 545(12.0) | 1 [Reference]           | 1 [Reference]           |                  |         |
| Father migration                         | 222(12.0) | 1.15(0.97-1.36)         | 1.10(0.91-1.32)         | 194(12.2) | 0.99(0.83-1.18)         | 0.92(0.75-1.12)         | 1.20             | 0.07    |
| Mother migration                         | 31(12.4)  | 1.11(0.75-1.65)         | 1.22(0.81-1.84)         | 28(12.2)  | 1.00(0.67-1.51)         | 0.90(0.52-1.25)         | 1.36             | 0.09    |
| Both parent migration                    | 113(11.1) | 1.04(0.83-1.29)         | 1.02(0.81-1.29)         | 114(12.8) | 1.15(0.92-1.43)         | 0.99(0.77-1.26)         | 1.03             | 0.22    |
| <b>Suicidal ideation</b>                 |           |                         |                         |           |                         |                         |                  |         |
| No migration                             | 672(14.0) | 1 [Reference]           | 1 [Reference]           | 738(16.2) | 1 [Reference]           | 1 [Reference]           |                  |         |
| Father migration                         | 275(14.9) | 1.07(0.92-1.25)         | 0.99(0.84-1.17)         | 280(16.2) | 1.00(0.86-1.16)         | 0.95(0.80-1.12)         | 1.04             | 0.19    |
| Mother migration                         | 28(11.2)  | 0.77(0.52-1.16)         | 0.83(0.54-1.26)         | 36(15.7)  | 0.96(0.67-1.38)         | 0.84(0.56-1.24)         | 0.99             | 0.24    |
| Both parent migration                    | 132(13.0) | 0.92(0.75-1.12)         | 0.88(0.71-1.09)         | 174(19.5) | 1.25(1.04-1.50)         | 1.08(0.88-1.33)         | 0.81             | 0.10    |
| <b>Suicide attempt</b>                   |           |                         |                         |           |                         |                         |                  |         |
| No migration                             | 148(3.1)  | 1 [Reference]           | 1 [Reference]           | 168(3.7)  | 1 [Reference]           | 1 [Reference]           |                  |         |
| Father migration                         | 68(3.7)   | 1.20(0.90-1.61)         | 1.12(0.82-1.53)         | 58(3.4)   | 0.91(0.67-1.23)         | 0.90(0.64-1.26)         | 1.24             | 0.10    |
| Mother migration                         | 11(4.4)   | 1.45(0.77-2.70)         | 1.73(0.91-3.29)         | 11(4.8)   | 1.31(0.70-2.45)         | 1.34(0.69-2.58)         | 1.29             | 0.15    |
| Both parent migration                    | 31(3.1)   | 0.99(0.67-1.47)         | 1.02(0.67-1.55)         | 40(4.5)   | 1.22(0.86-1.74)         | 1.12(0.76-1.65)         | 0.91             | 0.19    |

a, unadjusted model.

b, adjusted for participant province, age, ethnicity, sex, single-child family, single-parent family, educational level of main caregiver, family income, parenting style and offspring social support, loneliness, psychological resilience, emotional management ability scores.

c, calculated by adjusted OR

**eTable 5. Odds of NSSI, Suicidal Ideation and Suicide Attempt by Offspring Age When Parent Initially Migrated in Male vs Female Participants**

| Variable                                 | Male      |                         |                         | Female    |                         |                         | ROR <sup>c</sup> | P value |
|------------------------------------------|-----------|-------------------------|-------------------------|-----------|-------------------------|-------------------------|------------------|---------|
|                                          | N (%)     | OR (95%CI) <sup>a</sup> | OR (95%CI) <sup>b</sup> | N (%)     | OR (95%CI) <sup>a</sup> | OR (95%CI) <sup>b</sup> |                  |         |
| <b>Less-frequent NSSI (1-4 episodes)</b> |           |                         |                         |           |                         |                         |                  |         |
| No migration                             | 718(15.0) | 1 [Reference]           | 1 [Reference]           | 765(16.8) | 1 [Reference]           | 1 [Reference]           |                  |         |
| Preschool age (≤ 6y)                     | 248(18.6) | 1.36(1.16-1.60)         | 1.19(1.01-1.41)         | 291(21.8) | 1.42(1.22-1.66)         | 1.16(1.01-1.37)         | 1.03             | 0.21    |
| School age (6y~10y)                      | 224(17.7) | 1.20(1.02-1.42)         | 1.10(0.92-1.30)         | 216(20.4) | 1.26(1.06-1.49)         | 1.12(0.93-1.34)         | 0.98             | 0.22    |
| Adolescence (>10y)                       | 86(17.0)  | 1.16(0.90-1.49)         | 1.16(0.90-1.49)         | 87(18.9)  | 1.14(0.89-1.46)         | 1.08(0.83-1.40)         | 1.07             | 0.18    |
| <b>More-frequent NSSI (≥5 episodes)</b>  |           |                         |                         |           |                         |                         |                  |         |
| No migration                             | 536(11.2) | 1 [Reference]           | 1 [Reference]           | 545(12.0) | 1 [Reference]           | 1 [Reference]           |                  |         |
| Preschool age (≤ 6y)                     | 186(14.0) | 1.37(1.14-1.64)         | 1.27(1.04-1.55)         | 171(12.8) | 1.17(0.97-1.41)         | 0.96(0.77-1.19)         | 1.32             | 0.02    |
| School age (6y~10y)                      | 125(9.9)  | 0.90(0.72-1.11)         | 0.90(0.72-1.13)         | 115(10.8) | 0.94(0.76-1.16)         | 0.88(0.69-1.11)         | 1.02             | 0.23    |
| Adolescence (>10y)                       | 55(10.8)  | 0.99(0.74-1.34)         | 1.05(0.77-1.43)         | 50(10.8)  | 0.92(0.67-1.25)         | 0.97(0.70-1.35)         | 1.08             | 0.19    |
| <b>Suicidal ideation</b>                 |           |                         |                         |           |                         |                         |                  |         |
| No migration                             | 672(14.0) | 1 [Reference]           | 1 [Reference]           | 738(16.2) | 1 [Reference]           | 1 [Reference]           |                  |         |
| Preschool age (≤ 6y)                     | 215(16.1) | 1.18(1.00-1.40)         | 1.03(0.86-1.24)         | 263(19.7) | 1.27(1.09-1.49)         | 1.09(0.91-1.30)         | 0.94             | 0.17    |
| School age (6y~10y)                      | 163(12.8) | 0.90(0.75-1.09)         | 0.86(0.71-1.05)         | 166(15.6) | 0.96(0.80-1.15)         | 0.93(0.76-1.13)         | 0.92             | 0.15    |
| Adolescence (>10y)                       | 57(11.2)  | 0.78(0.58-1.04)         | 0.80(0.59-1.08)         | 61(13.2)  | 0.79(0.60-1.04)         | 0.83(0.62-1.12)         | 0.96             | 0.22    |
| <b>Suicide attempt</b>                   |           |                         |                         |           |                         |                         |                  |         |
| No migration                             | 148(3.1)  | 1 [Reference]           | 1 [Reference]           | 168(3.7)  | 1 [Reference]           | 1 [Reference]           |                  |         |
| Preschool age (≤ 6y)                     | 55(4.1)   | 1.35(0.99-1.86)         | 1.22(0.87-1.72)         | 60(4.5)   | 1.23(0.91-1.66)         | 1.07(0.76-1.51)         | 1.14             | 0.15    |
| School age (6y~10y)                      | 37(2.9)   | 0.94(0.65-1.36)         | 0.96(0.66-1.41)         | 30(2.8)   | 0.76(0.51-1.13)         | 0.79(0.52-1.19)         | 1.22             | 0.13    |
| Adolescence (>10y)                       | 18(3.6)   | 1.16(0.70-1.90)         | 1.28(0.77-2.15)         | 19(4.1)   | 1.12(0.69-1.82)         | 1.36(0.82-2.24)         | 0.94             | 0.22    |

a, unadjusted model.

b, adjusted for participant province, age, ethnicity, sex, single-child family, single-parent family, educational level of main caregiver, family income, parenting style and offspring social support, loneliness, psychological resilience, emotional management ability scores.

c, calculated by adjusted OR.
